# Supplementary material for: Biotransformation of neuro-inflammation inhibitor kellerin using Angelica sinensis (Oliv.) Diels callus
Source: Royal Society of Chemistry journal article supplement (doi:10.1039/c6ra22502k), 2016-01-01
Supplement: c6ra22502k1.pdf [file c6ra22502k1.pdf]

**Biotransformation of neuro-inflammation inhibitor Kelllerin by  
*Angelica sinensis* (Oliv.) Diels callus**

Di Zhou <sup>a</sup>, Ning Li <sup>a\*</sup>, Yuhua Zhang <sup>b</sup>, Chunyan Yan <sup>b</sup>, Kun Jiao <sup>c</sup>, Yu Sun <sup>d</sup>, Hui Ni <sup>d</sup>, Bin Lin <sup>e</sup>,  
Yue Hou <sup>c\*</sup>

<sup>a</sup> School of Traditional Chinese Materia Medica, Shenyang Pharmaceutical University, Key Laboratory of Structure-Based Drug Design and Discovery, Ministry of Education, Wenhua Road 103, Shenyang 110016, China

<sup>b</sup> College of Pharmacy, Guangdong Pharmaceutical University, Guangzhou, 510006, PR China

<sup>c</sup> College of Life and Health Sciences, Northeastern University, Shenyang 110004, China

<sup>d</sup> XinJiang Institute of Chinese Materia Medica and Ethnodrug, Urumqi 830002, China

<sup>e</sup> School of Pharmaceutical Engineering, Shenyang Pharmaceutical University, Shenyang 110016, P. R. China

\* Correspondence

Dr. Ning Li, School of Traditional Chinese Materia Medica 49#, Key Laboratory of Structure-Based Drug Design and Discovery (Shenyang Pharmaceutical University), Ministry of Education, Wenhua Road 103, Shenyang 110016, China. E-mail: liningsypharm@163.com Tel: +86-24-23986475. Fax: +86-24-31509368.

Dr. Yue Hou, College of Life and Health Sciences, Northeastern University, Wenhua Road 3-11, Shenyang 110004, China. E-mail: houyue@mail.neu.edu.cn

## Spectroscopic data of known compounds

### 1. (3'S, 5'S, 8'R, 9'S, 10'R)-deacetylkellerin (**5**)

White crystal (actone). MS  $[M + Na]^+$   $m/z$  423.4 ( $C_{24}H_{32}NaO_5$ ),  $^1H$  NMR (400 MHz,  $CD_3OD$ ):  $\delta$  (ppm) 7.88 (1H, d,  $J = 9.5$  Hz, H-4), 7.52 (1H, d,  $J = 8.4$  Hz, H-5), 6.95 (2H, m, H-6, 8), 6.23 (1H, d,  $J = 9.5$  Hz, H-3), 4.32 (1H, dd,  $J = 10.4, 3.2$  Hz, H-11'a), 4.05 (1H, dd,  $J = 10.4, 3.1$  Hz, H-11'b), 3.64 (1H, t,  $J = 2.6$  Hz, H-3'), 1.37 (3H, s, H-15'), 1.27 (3H, s, H-12'), 0.97 (3H, s, H-13'), 0.88 (3H, s, H-14').

### 2. ferukrin (**6**)

White crystal (actone). MS  $[M + Na]^+$   $m/z$  423.4 ( $C_{24}H_{32}NaO_5$ ),  $^1H$  NMR (400 MHz,  $CD_3OD$ ):  $\delta$  (ppm) 7.89 (1H, d,  $J = 9.6$  Hz, H-4), 7.54 (1H, br.d,  $J = 8.4$  Hz, H-5), 6.90 (2H, m, H-6, 8), 6.25 (1H, d,  $J = 9.6$  Hz, H-3), 4.19 (1H, dd,  $J = 10.4, 3.2$  Hz, H-11'a), 4.18 (1H, dd,  $J = 10.4, 3.2$  Hz, H-11'b), 3.09 (1H, dd,  $J = 11.2, 4.8$  Hz, H-3'), 1.34 (3H, s, H-15'), 1.27 (3H, s, H-12'), 1.03 (3H, s, H-13'), 0.82 (3H, s, H-14').

### 3. gummosin (**7**)

White crystal (actone). MS  $[M + Na]^+$   $m/z$  405.4 ( $C_{24}H_{30}NaO_4$ ),  $^1H$  NMR (400 MHz,  $CD_3OD$ ):  $\delta$  (ppm) 7.88 (1H, d,  $J = 9.6$  Hz, H-4), 7.51 (1H, d,  $J = 8.8$  Hz, H-5), 6.96 (1H, d,  $J = 2.4$  Hz, H-8), 6.90 (1H, d,  $J = 8.8, 2.4$  Hz, H-6), 6.23 (1H, d,  $J = 9.6$  Hz, H-3), 4.80 (1H, br. s, H-12'a), 4.70 (1H, br. s, H-12'b), 4.45 (1H, dd,  $J = 10.0, 5.4$  Hz, H-11'a), 4.13 (1H, dd,  $J = 10.0, 6.9$  Hz, H-11'b), 3.41 (1H, br. s, H-3'), 1.78-1.48 (9H, m, H-1', 2', 5', 6', 7') 1.04 (3H, s, H-15') 0.99 (3H, s, H-13'), 0.87 (3H, s, H-14').

### 4. 7-hydroxycoumarin (**8**)

Light yellow needle crystal ( $CH_2Cl_2$ - $CH_3OH$ ). MS  $[M + Na]^+$   $m/z$  185.1 ( $C_9H_6NaO_3$ ),  $[M - H]^-$   $m/z$  160.9 ( $C_9H_5O_3$ ),  $^1H$  NMR (400 MHz,  $CD_3OD$ ):  $\delta$  (ppm) 7.84 (1H, d,  $J = 9.2$  Hz, H-4), 7.44 (1H, d,  $J = 8.4$  Hz, H-5), 6.78 (1H, dd,  $J = 2.4, 8.4$  Hz, H-6), 6.69 (1H, d,  $J = 2.4$  Hz, H-8), 6.17 (1H, d,  $J = 9.2$  Hz, H-3).

5. ferulic acid (**9**)

White crystal (CH<sub>2</sub>Cl<sub>2</sub>-CH<sub>3</sub>OH). MS [M + Na]<sup>+</sup> *m/z* 217.3 (C<sub>10</sub>H<sub>10</sub>NaO<sub>4</sub>); [M - H]<sup>-</sup> *m/z* 192.9 (C<sub>10</sub>H<sub>9</sub>O<sub>4</sub>), <sup>1</sup>H NMR (400 MHz, DMSO-*d*<sub>6</sub>): δ (ppm) 7.50 (1H, d, *J* = 15.9 Hz, H-7), 7.28 (1H, d, *J* = 1.8 Hz, H-2), 7.08 (1H, dd, *J* = 8.0, 1.8 Hz, H-6), 6.79 (1H, d, *J* = 8.0 Hz, H-5), 6.37 (1H, d, *J* = 15.9 Hz, H-8), 3.81 (3H, s, -OCH<sub>3</sub>).

6. bis (2-ethylhexyl) phthalate (**10**)

Colorless oil (CH<sub>3</sub>OH). MS [M + Na]<sup>+</sup> *m/z* 413.5 (C<sub>24</sub>H<sub>38</sub>NaO<sub>4</sub>), <sup>1</sup>H NMR (400 MHz, CD<sub>3</sub>OD): δ (ppm) 7.71 (2H, m, H-3,6), 7.62 (2H, m, H-4,5), 4.22 (4H, dd, *J* = 2.8, 5.5 Hz, H-1',1''), 1.43-1.29 (8H, m), 0.94 (6H, t, *J* = 7.5 Hz, H-2', 2''), 0.90 (6H, t, *J* = 7.8 Hz, H-6', 6''); <sup>13</sup>C NMR (100 MHz, CD<sub>3</sub>OD): δ (ppm) 169.5 (C=O), 133.7 (C-1, 2), 132.6 (C-4, 5), 130.0 (C-3, 6), 69.3 (C-1', 1''), 40.3 (C-2', 2''), 31.8 (C-3', 3''), 30.3 (C-5', 5''), 25.1 (C-4', 4''), 14.6 (CH<sub>3</sub>-2', 2''), 11.6 (CH<sub>3</sub>-6', 6'').

7. 3-heptyl-3-hydroxy-2,4 (1*H*, 3*H*)-quinolinediones (**11**)

Yellow solid (CH<sub>3</sub>OH). MS [M + Na]<sup>+</sup> *m/z* 298.3 (C<sub>16</sub>H<sub>21</sub>NaNO<sub>3</sub>), <sup>1</sup>H NMR (600 MHz, DMSO-*d*<sub>6</sub>): δ (ppm) 10.76 (s, 1H), 7.70 (1H, dd, *J* = 1.2, 7.2 Hz, H-5), 7.58 (1H, td, *J* = 1.2, 7.2 Hz, H-6), 7.10 (1H, td, *J* = 1.2, 7.2 Hz, H-7), 7.05 (1H, d, *J* = 7.2 Hz, H-8), 5.66 (1H, s, NH), 1.66 (2H, m, H-1'), 1.23-1.36 (10H, m), 0.80 (3H, t, *J* = 7.0 Hz, H-6').

8. 7-methoxy-1-methyl-9*H*-pyrido[3,4-*b*]indole (**12**)

Yellow solid (CH<sub>3</sub>OH). MS [M + H]<sup>+</sup> *m/z* 213.3 (C<sub>13</sub>H<sub>13</sub>N<sub>2</sub>O), <sup>1</sup>H NMR (600 MHz, CD<sub>3</sub>OD): δ (ppm) 8.01 (1H, d, *J* = 5.4 Hz, H-3), 7.99 (1H, d, *J* = 8.7 Hz, H-5), 7.80 (1H, d, *J* = 5.4 Hz, H-4), 7.05 (1H, d, *J* = 2.1 Hz, H-8), 6.86 (1H, dd, *J* = 2.1, 8.7 Hz, H-6), 3.91 (3H, s, 7-OCH<sub>3</sub>), 2.77 (3H, s); <sup>13</sup>C NMR (150 MHz, methanol-*d*<sub>4</sub>): δ (ppm) 162.7 (C-7), 144.5 (C-1), 142.4 (C-13), 138.1 (C-3), 130.8 (C-13), 130.3 (C-11), 123.7 (C-5), 116.6 (C-12), 113.5 (C-4), 111.2 (C-6), 95.6 (C-8), 56.1 (CH<sub>3</sub>O), 19.6

(CH<sub>3</sub>).

9. methyl butyrate (**13**)

Yellow solid (CH<sub>3</sub>OH). MS [M - H]<sup>-</sup> *m/z* 101.0 (C<sub>5</sub>H<sub>9</sub>O<sub>2</sub>), <sup>1</sup>H NMR (400 MHz, CD<sub>3</sub>OD): δ (ppm) 3.65 (3H, s, OCH<sub>3</sub>), 2.32 (2H, t, *J* = 7.2 Hz, H-2), 1.60 (2H, m, H-3), 0.92 (3H, t, *J* = 6.4 Hz, H-4).

10. (*Z*)-3-methyl-4-oxobut-2-enoic acid (**14**)

White needles (CH<sub>3</sub>OH). MS [M + Na]<sup>+</sup> *m/z* 137.0 (C<sub>5</sub>H<sub>6</sub>NaO<sub>3</sub>); [M - H]<sup>-</sup> *m/z* 112.9 (C<sub>5</sub>H<sub>5</sub>NO<sub>3</sub>), <sup>1</sup>H NMR (400 MHz, DMSO-*d*<sub>6</sub>): δ (ppm) 10.98 (1H, s, COOH), 10.72 (1H, s, CHO), 7.26 (1H, s, H-2), 1.72 (3H, s, H-3); <sup>13</sup>C NMR (100 MHz, DMSO-*d*<sub>6</sub>): δ (ppm) 174.6 (CHO), 161.1 (COOH), 147.4 (C-2), 117.3 (C-3), 21.5 (CH<sub>3</sub>).

11. Substrate: (3'*S*, 5'*S*, 8'*R*, 9'*S*, 10'*R*)-kellerin

Yellow oil (CH<sub>3</sub>OH). [M + Na]<sup>+</sup> *m/z* 465.4 (C<sub>26</sub>H<sub>34</sub>NaO<sub>5</sub>), <sup>1</sup>H-NMR (400 MHz, CD<sub>3</sub>OD): δ (ppm) 7.89 (1H, d, *J* = 9.5 Hz, H-4), 7.35 (1H, d, *J* = 8.5 Hz, H-5), 6.83 (1H, dd, *J* = 8.5, 2.4 Hz, H-6), 6.80 (1H, d, *J* = 2.2 Hz, H-8), 6.22 (1H, d, *J* = 9.5 Hz, H-3), 5.27 (1H, s, -OH), 4.60 (1H, br. s, H-3'), 4.14 (2H, d, *J* = 2.6 Hz, H-11'), 1.75 (3H, s, -COCH<sub>3</sub>), 1.73 (1H, m, H-5'), 1.50 (1H, m, H-9'), 1.33 (3H, s, H-15'), 1.29 (3H, s, H-12'), 0.90 (3H, s, H-14'), 0.87 (3H, s, H-13').

**Fig. 1S** BV2 cell viability assay of transformed products and substrate on LPS-induced NO production in BV2 microglial cells (Each bar represents the means  $\pm$  SE of three independent experiments. Significance: \* $P$ <0.05, \*\* $P$ <0.01, \*\*\* $P$ <0.001 compared to LPS groups. ### $P$ <0.001 compared to control groups. LPS: lipopolysaccharide).

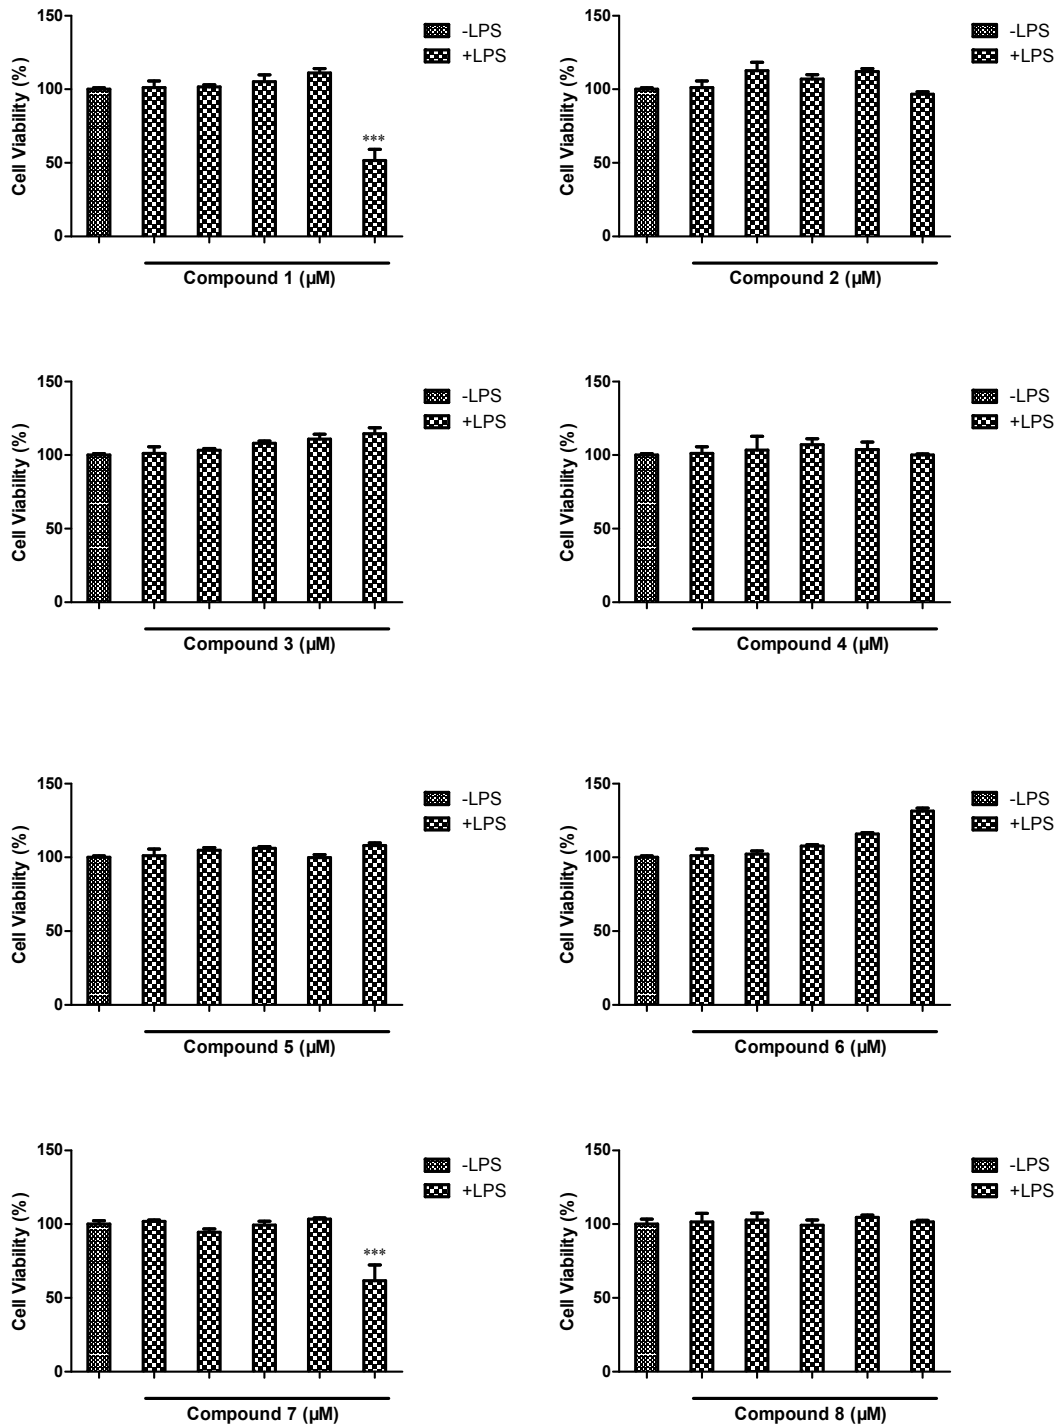

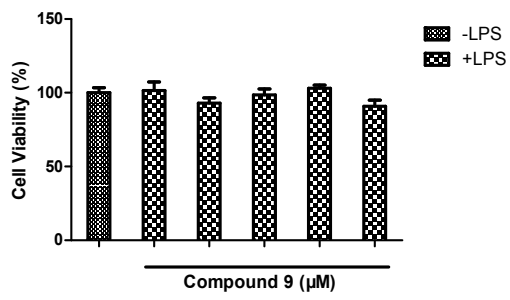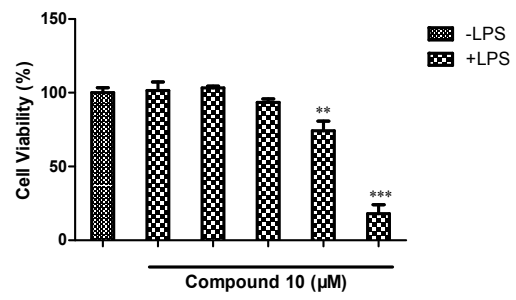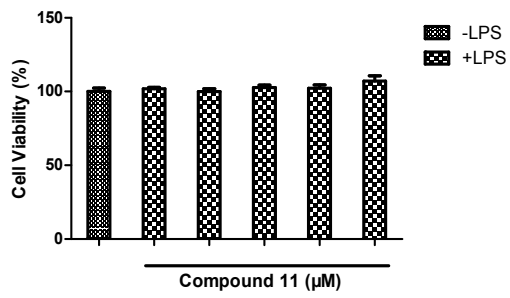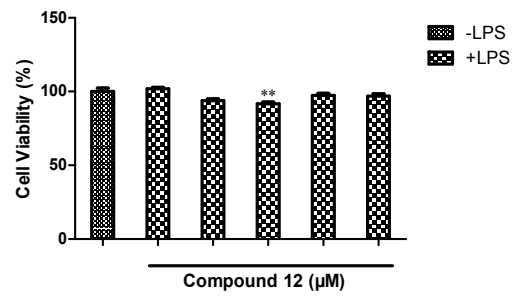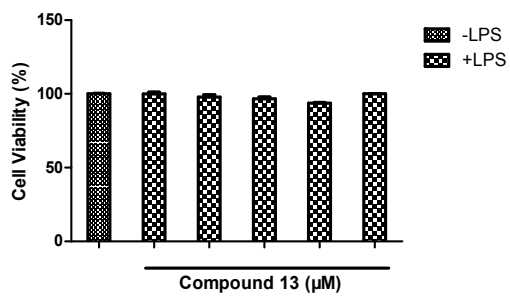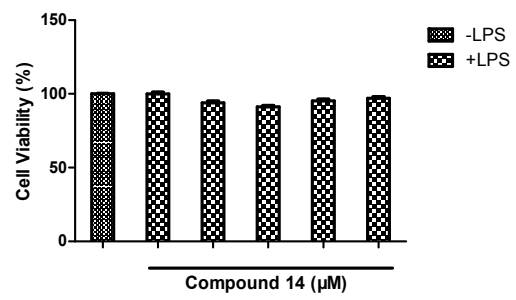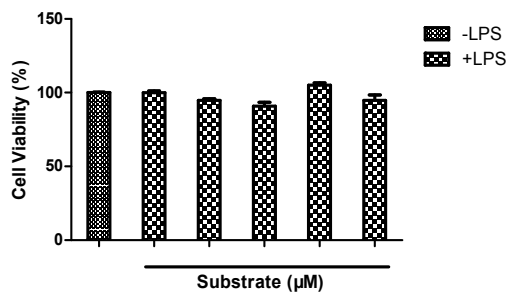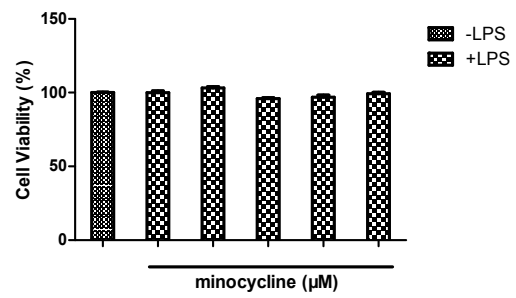

# <sup>1</sup>H NMR and MS spectra of all products

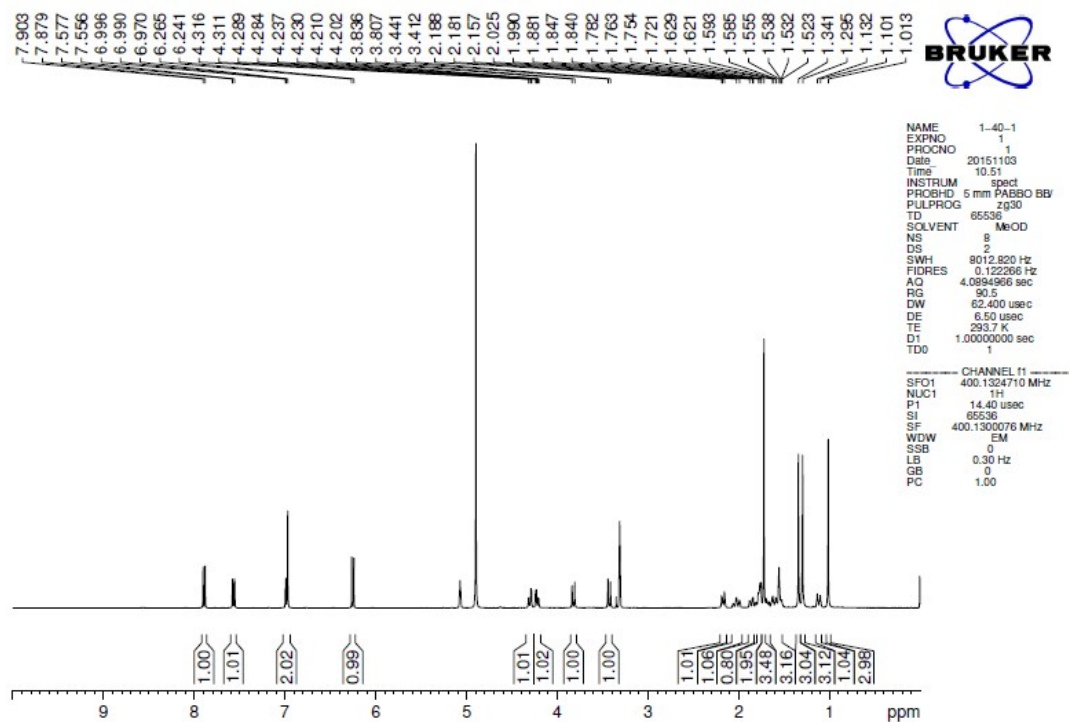

<sup>1</sup>H-NMR spectrum of compound 1

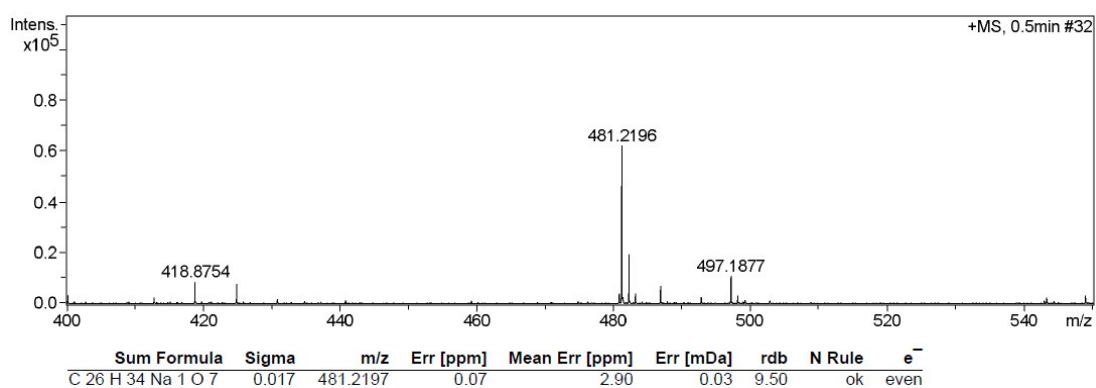

HR-ESI-MS spectrum of compound 1

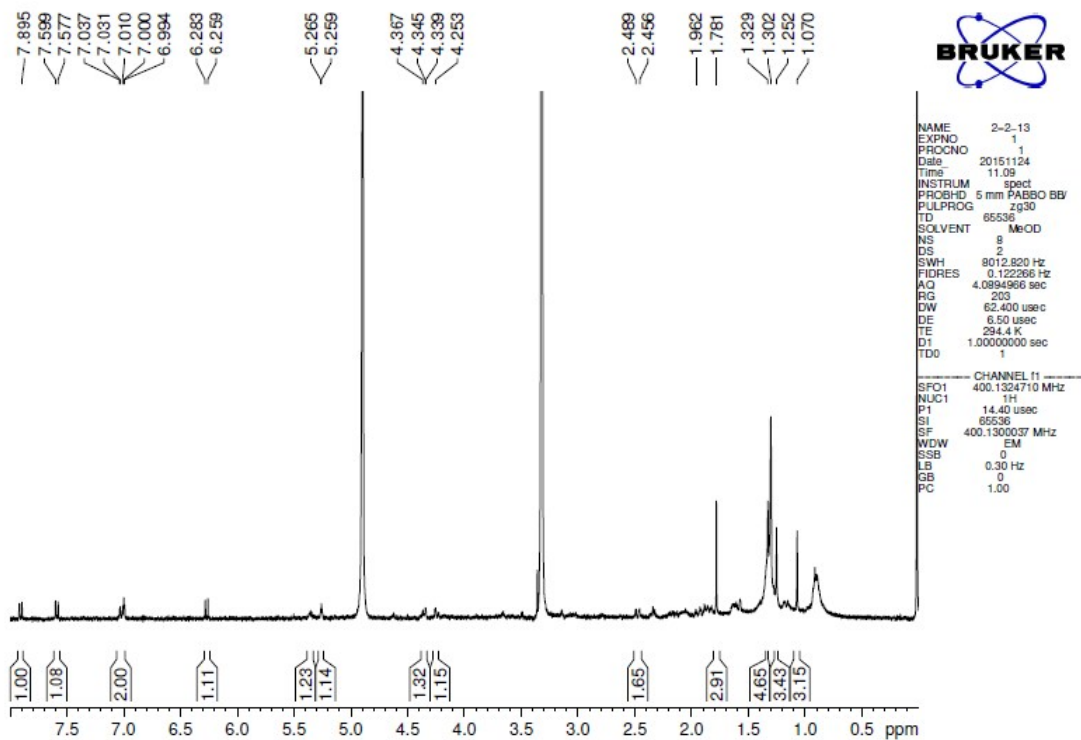

<sup>1</sup>H-NMR spectrum of compound 2

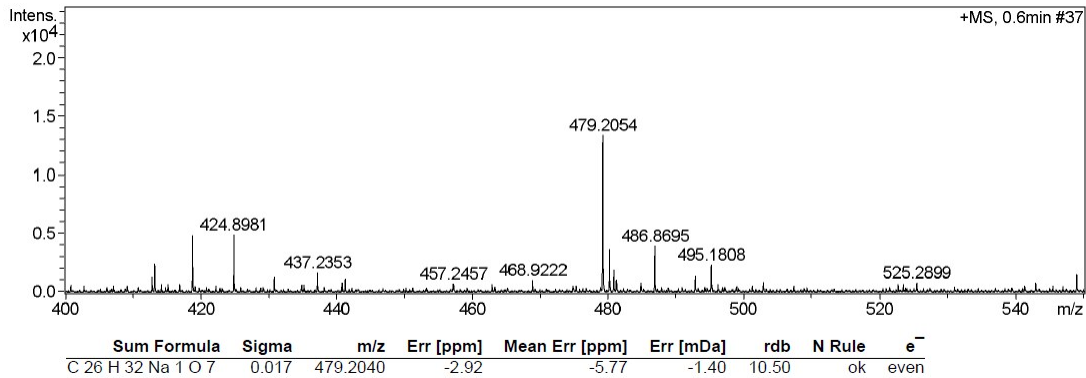

HR-ESI-MS spectrum of compound 2



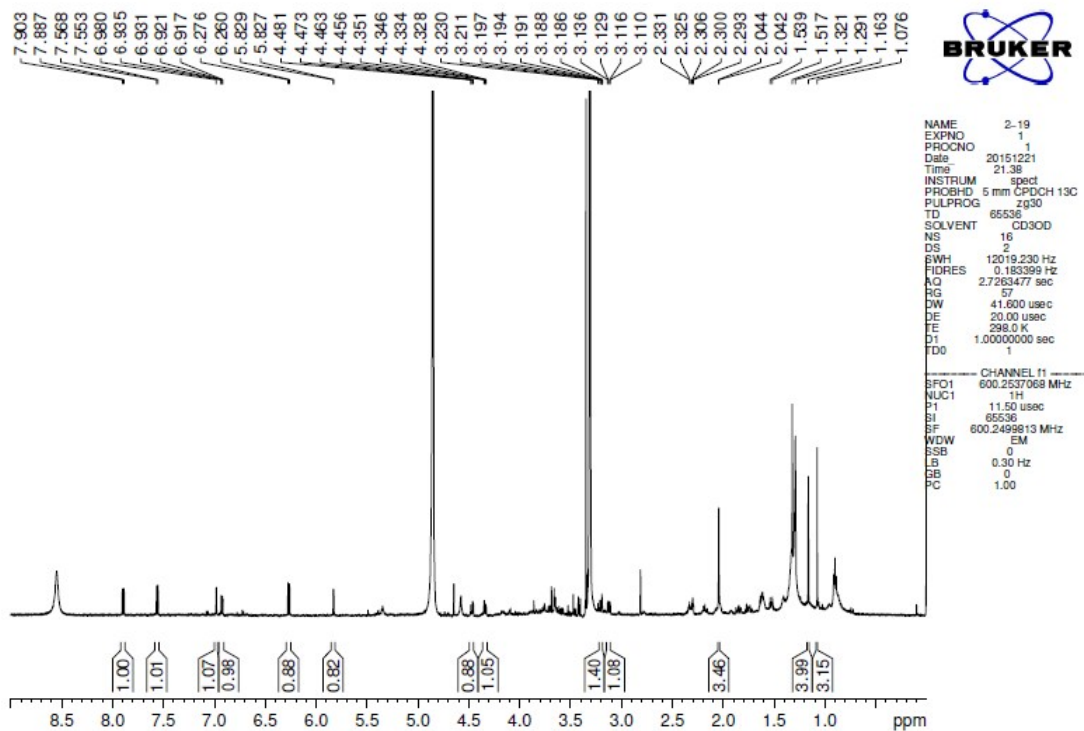

<sup>1</sup>H-NMR spectrum of compound 3

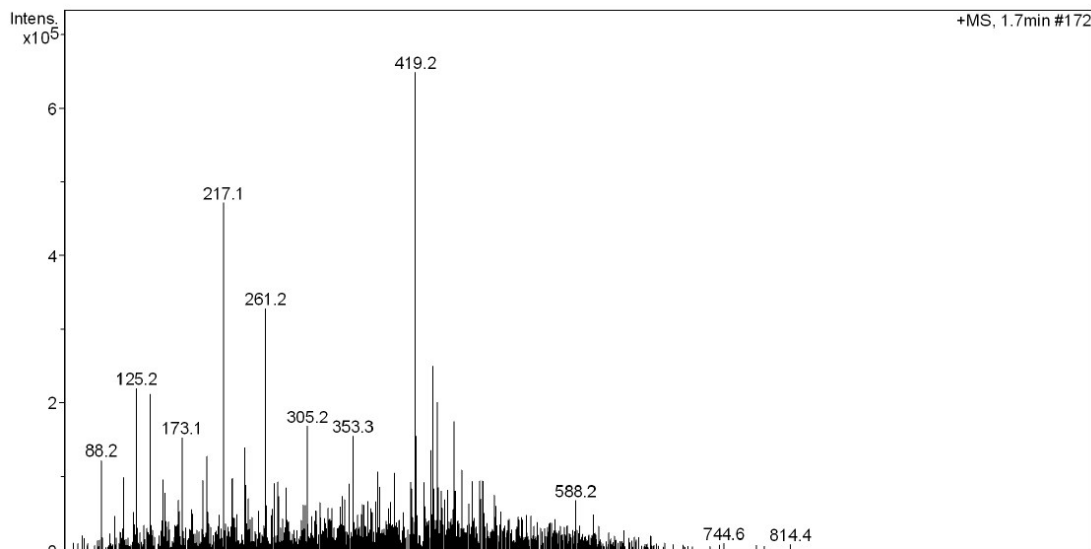

MS spectrum of compound 3

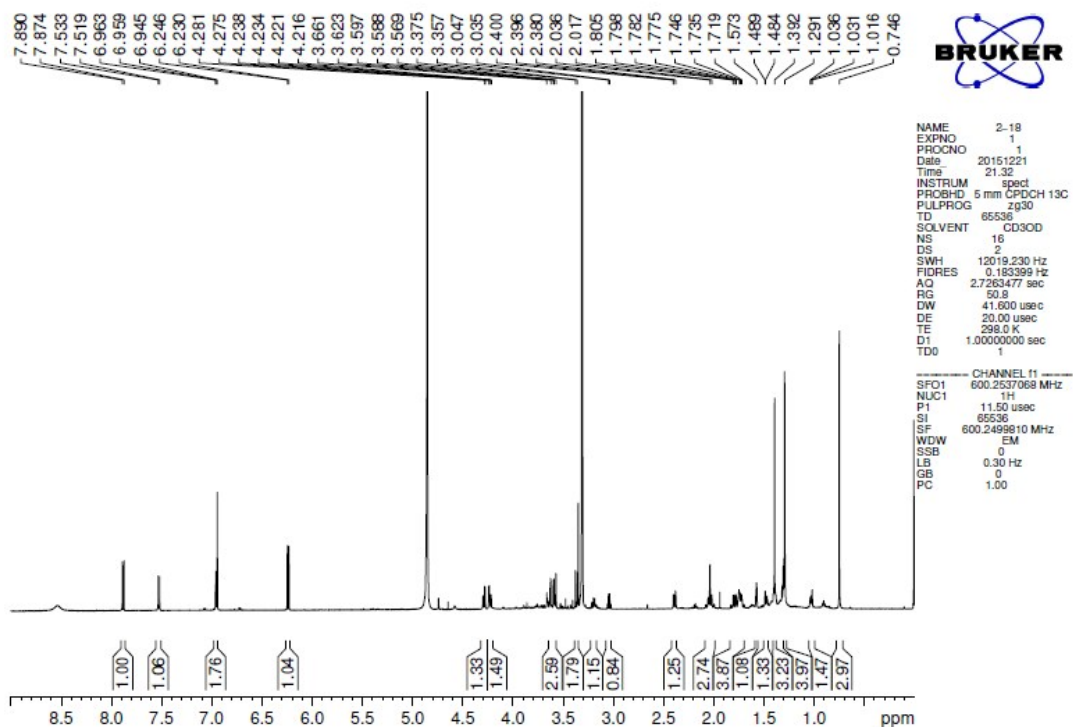

<sup>1</sup>H-NMR spectrum of compound 4

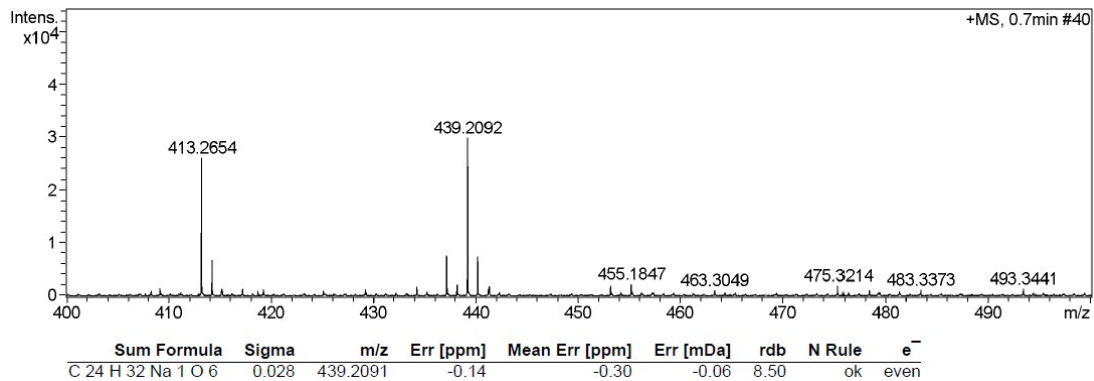

HR-ESI-MS spectrum of compound 4

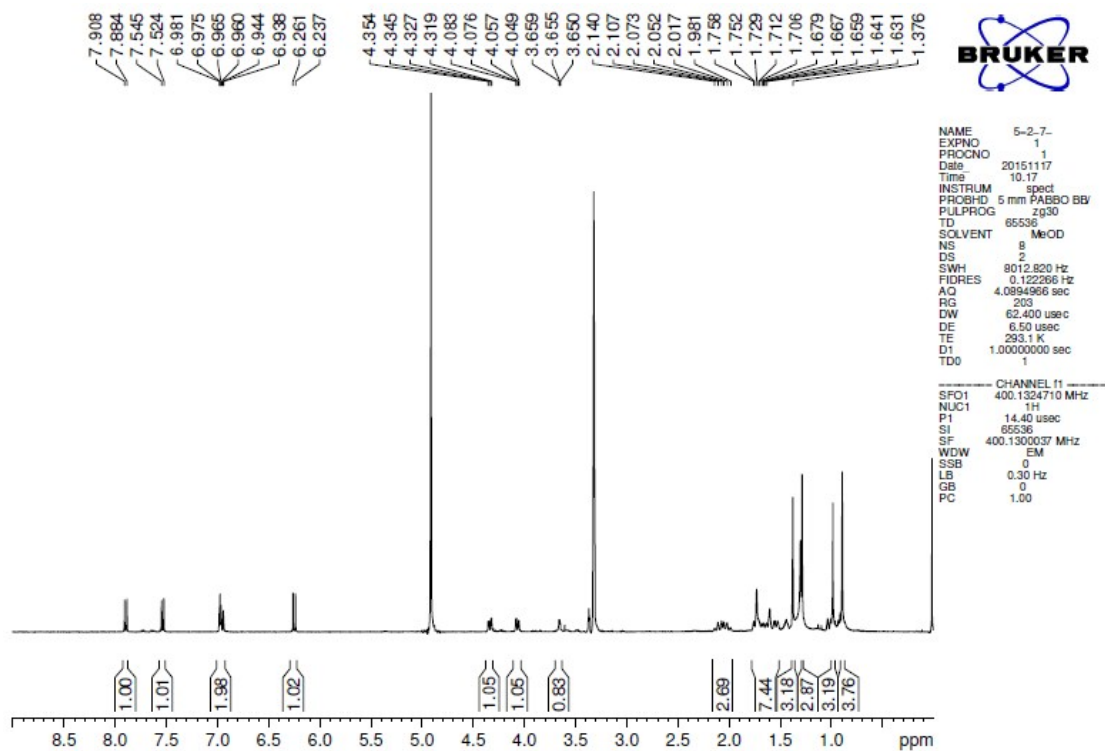

<sup>1</sup>H-NMR spectrum of compound **5**

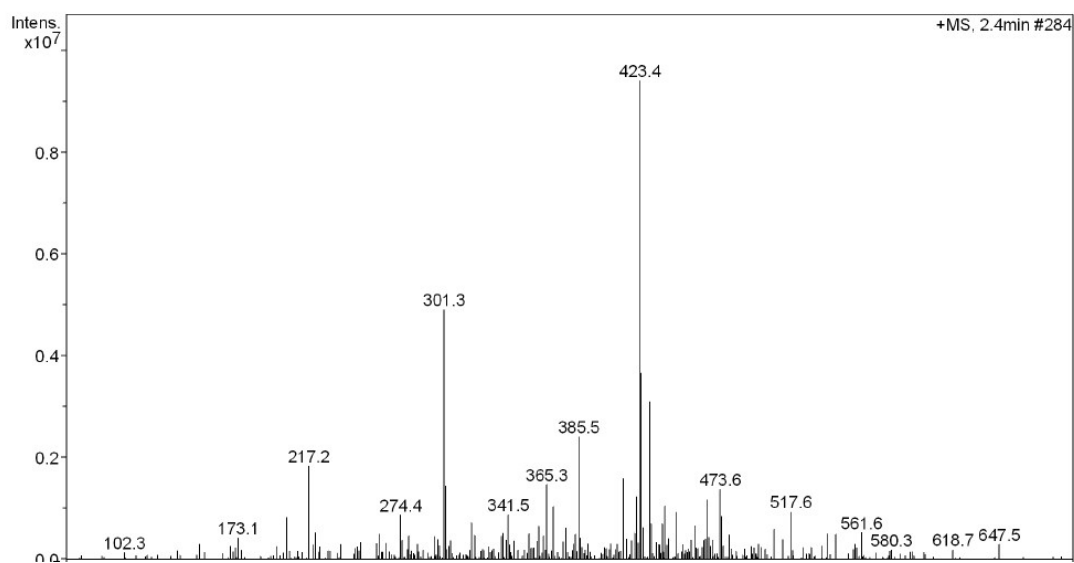

MS spectrum of compound **5**

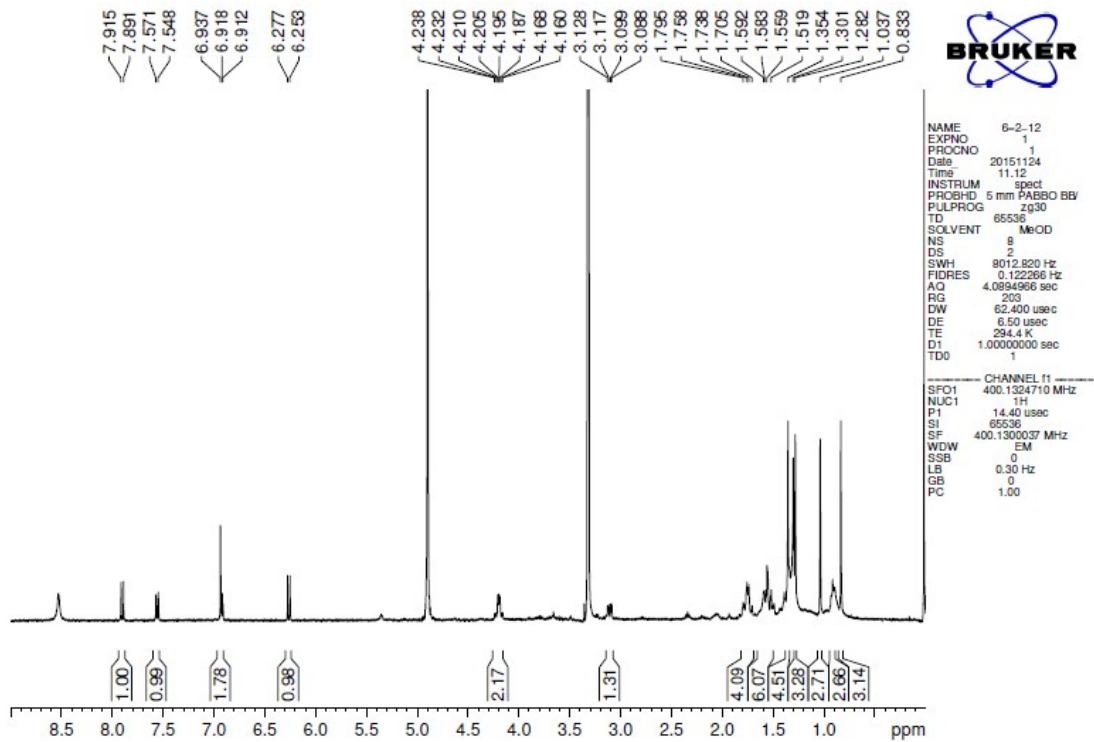

<sup>1</sup>H-NMR spectrum of compound 6

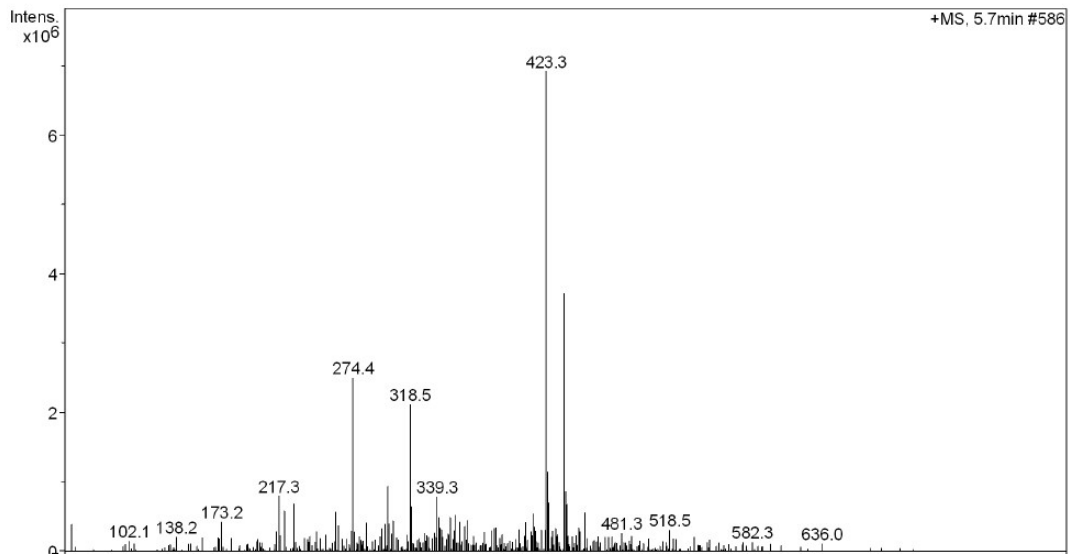

MS spectrum of compound 6

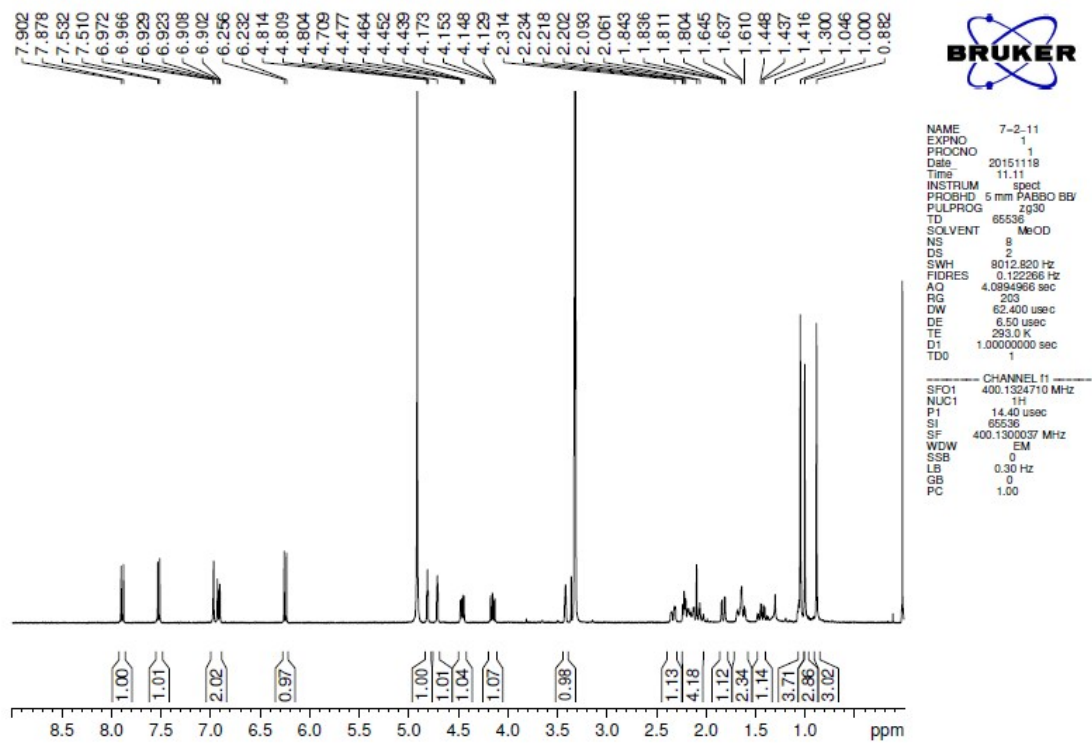

<sup>1</sup>H-NMR spectrum of compound 7

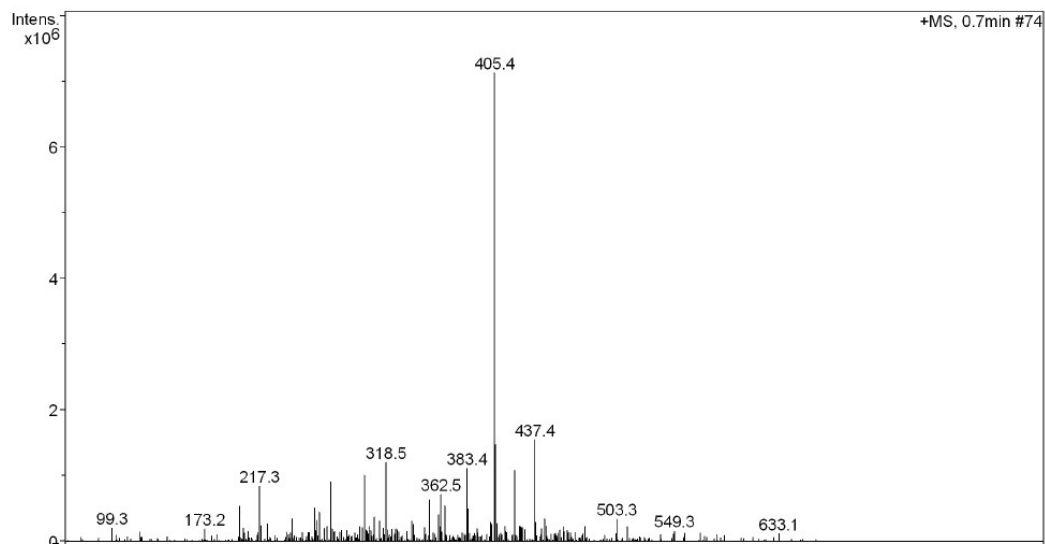

MS spectrum of compound 7

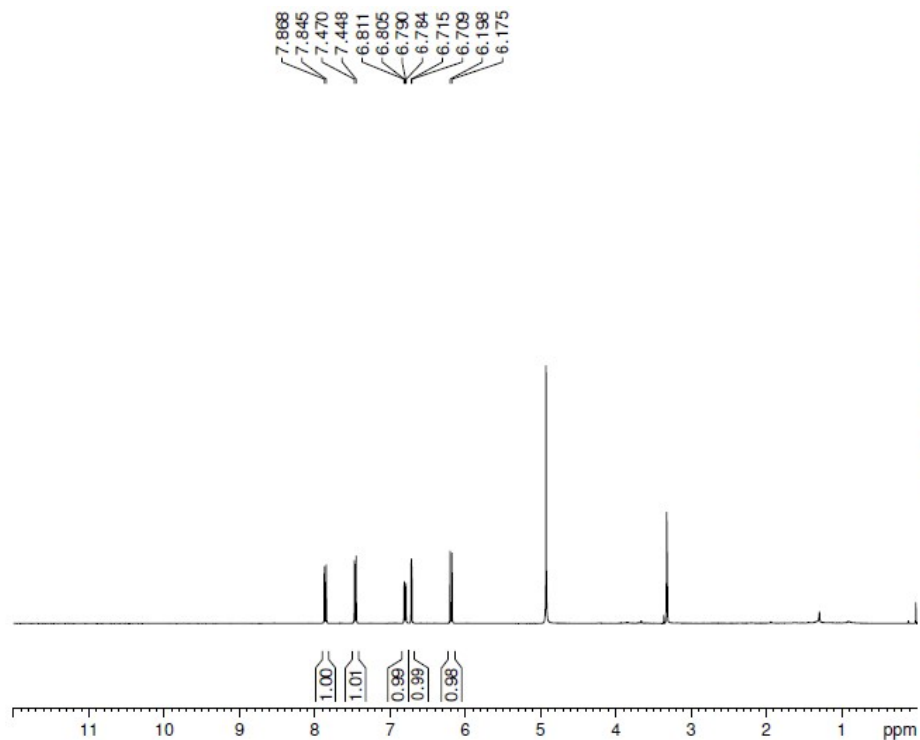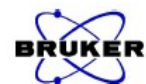

NAME 8-2-B-7-OH  
EXPNO 1  
PROCNO 1  
Date\_ 20151117  
Time 10.14  
INSTRUM spect  
PROBHD 5 mm PABBO BB  
PULPROG zg30  
TD 65536  
SOLVENT MeOD  
NS 8  
DS 2  
SWH 8012.820 Hz  
FIDRES 0.122266 Hz  
AQ 4.0894966 sec  
RG 203  
DW 62.400 usec  
DE 6.50 usec  
TE 293.1 K  
D1 1.00000000 sec  
TD0 1

----- CHANNEL f1 -----  
SFO1 400.1324710 MHz  
NUC1 1H  
P1 14.40 usec  
SI 65536  
SF 400.1300037 MHz  
WDW EM  
SSB 0  
LB 0.30 Hz  
GB 0  
PC 1.00

<sup>1</sup>H-NMR spectrum of compound **8**

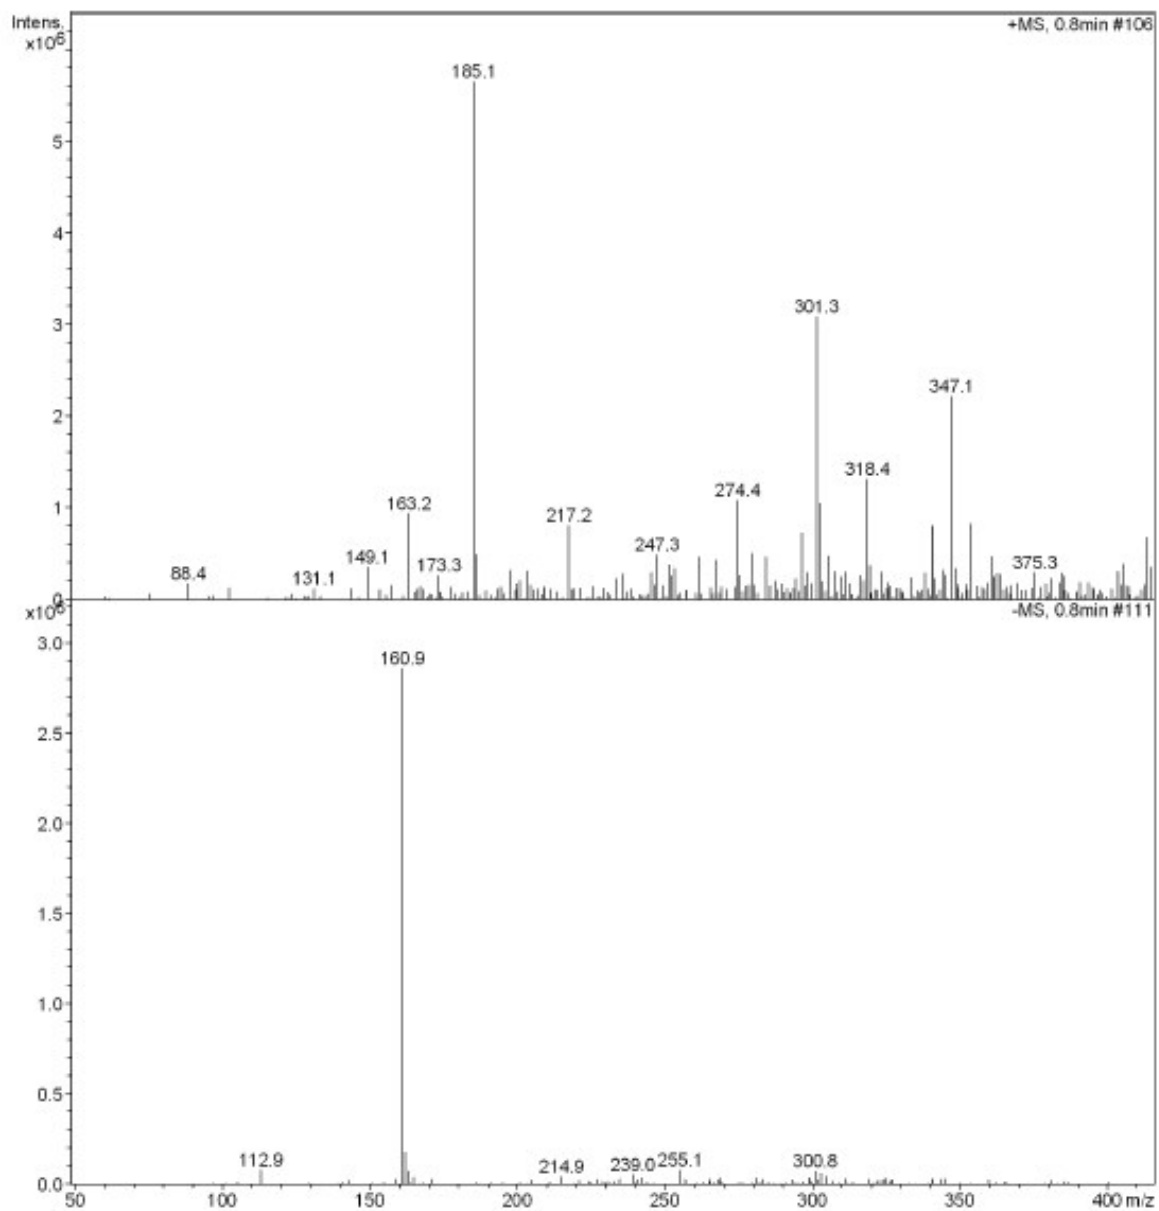

MS spectrum of compound 8

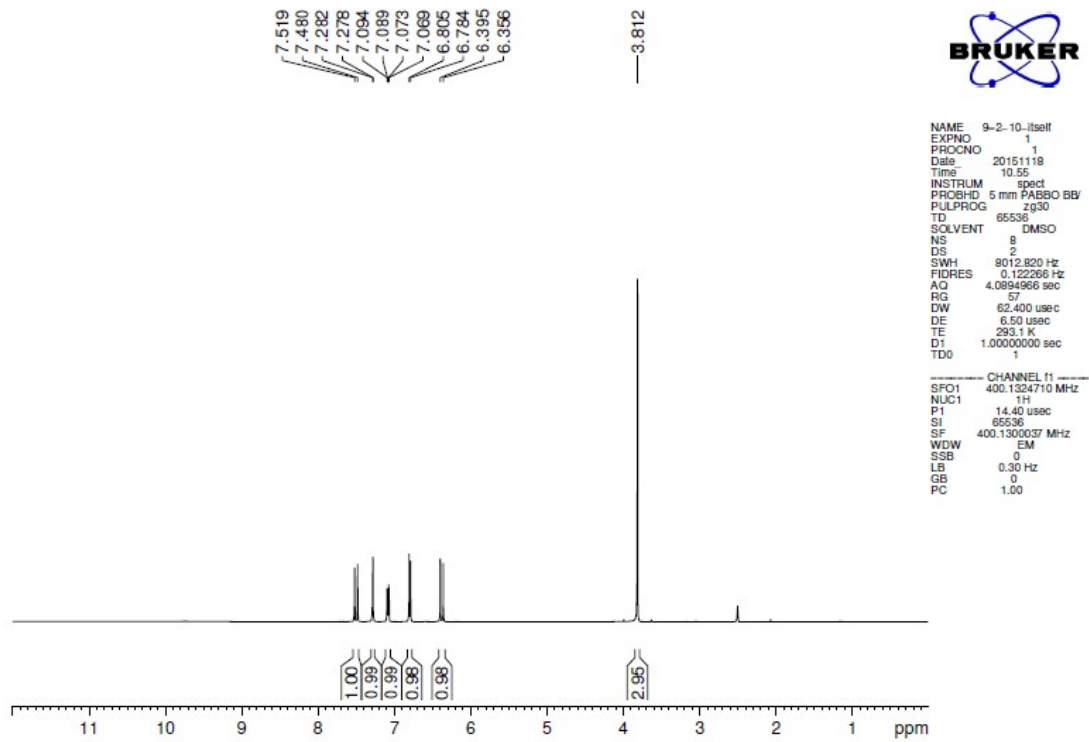

<sup>1</sup>H-NMR spectrum of compound **9**



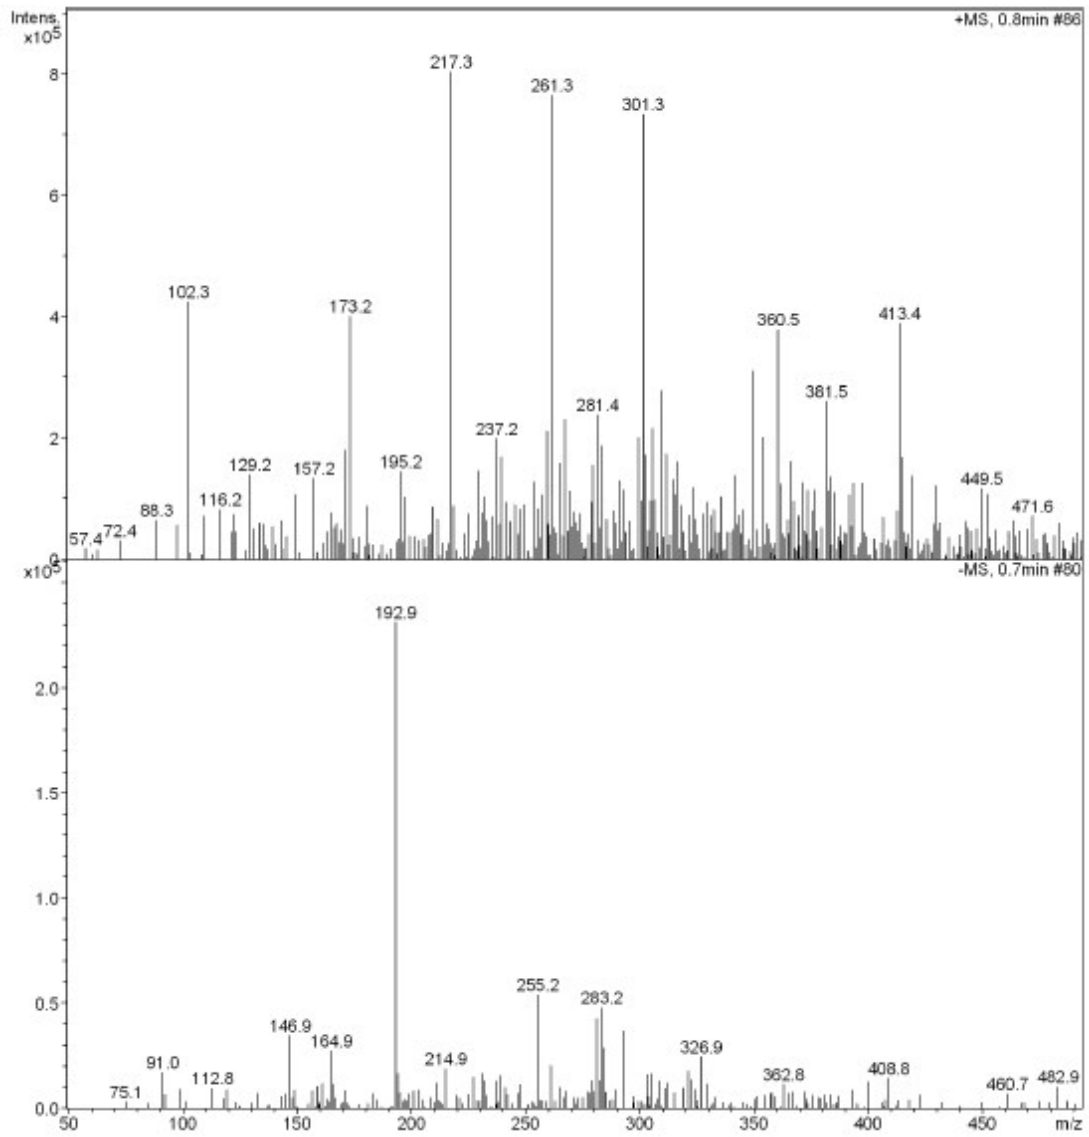

MS spectrum of compound 9

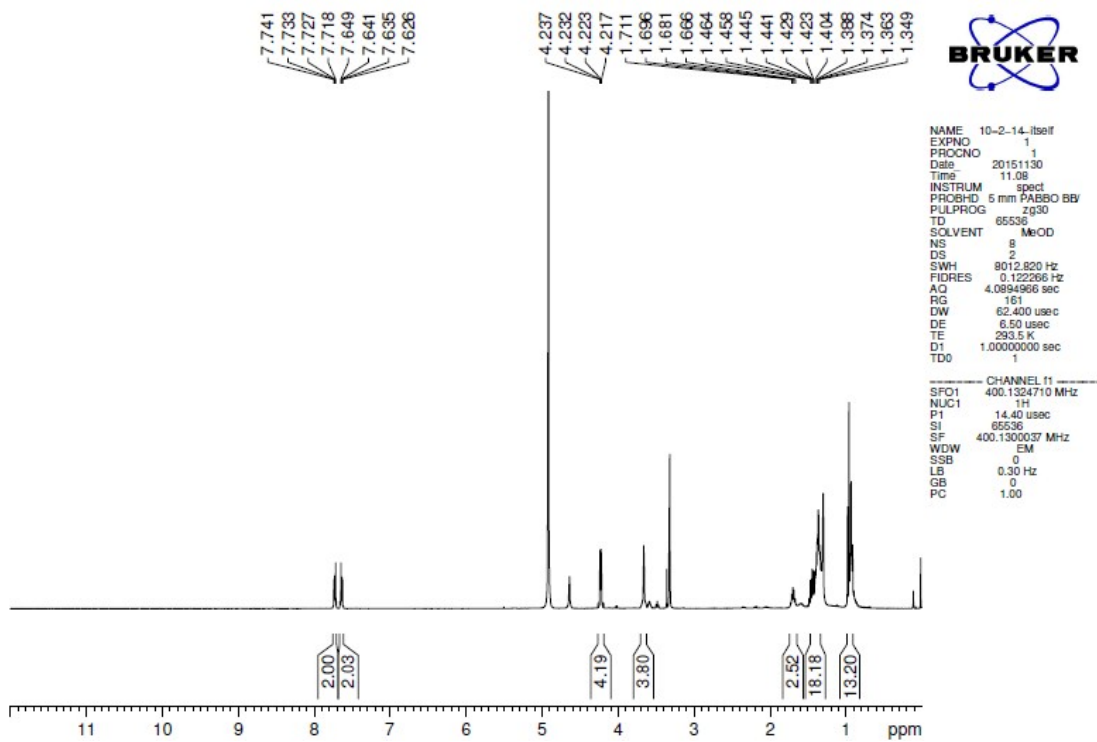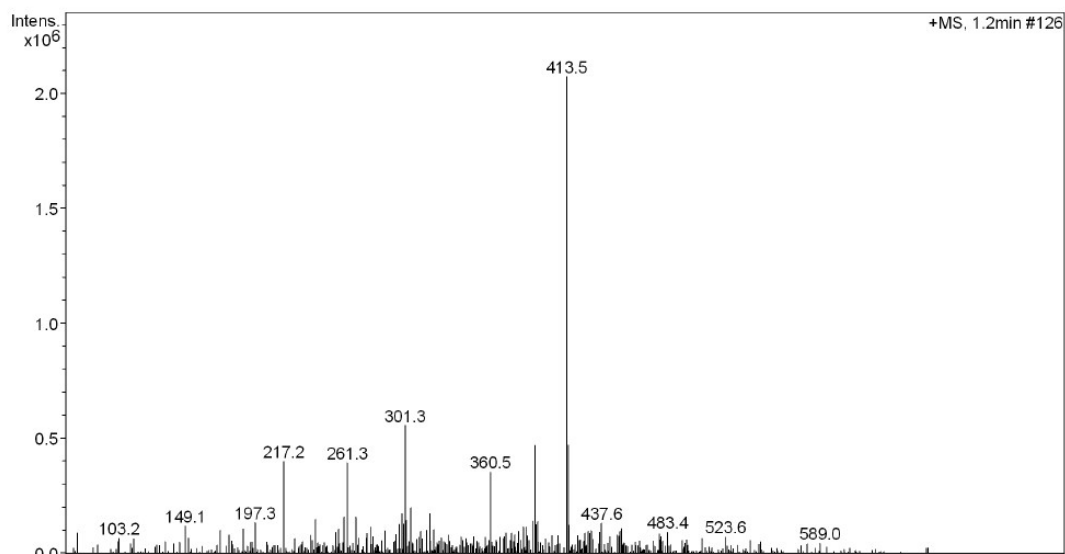

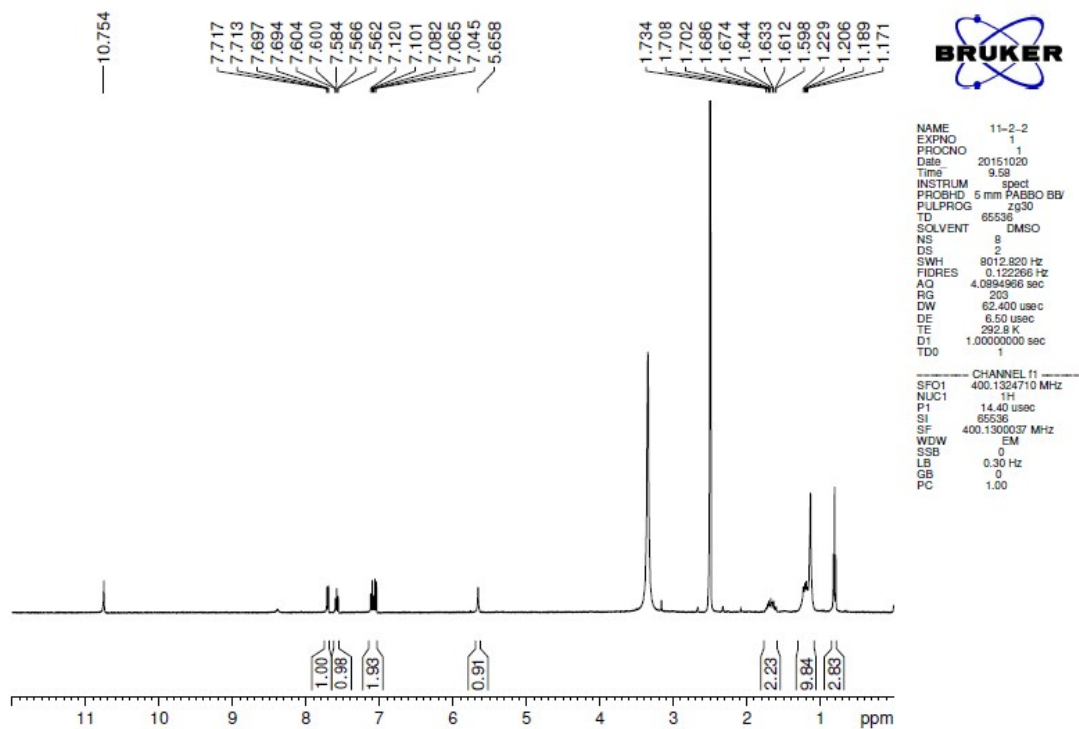

<sup>1</sup>H-NMR spectrum of compound **11**

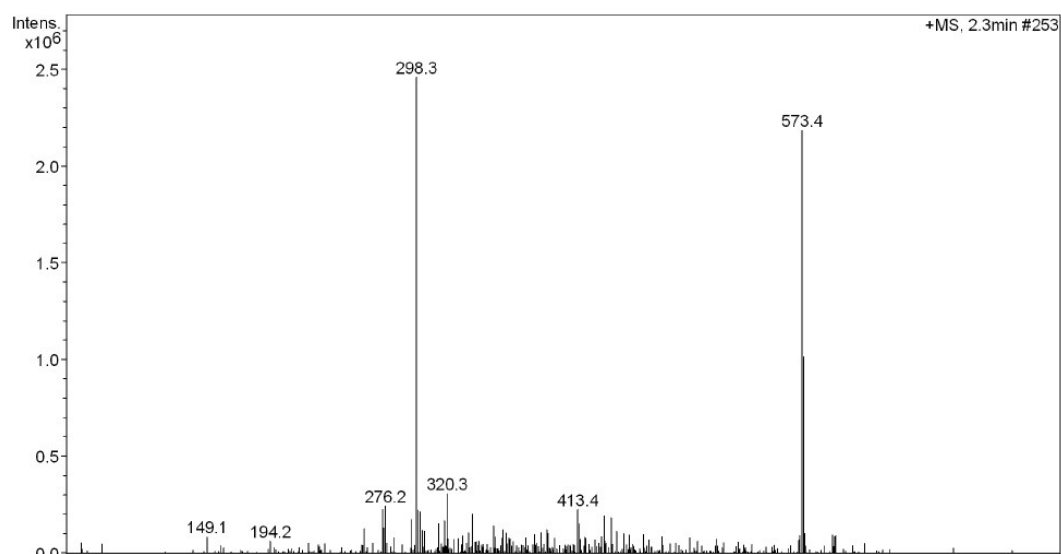

MS spectrum of compound **11**

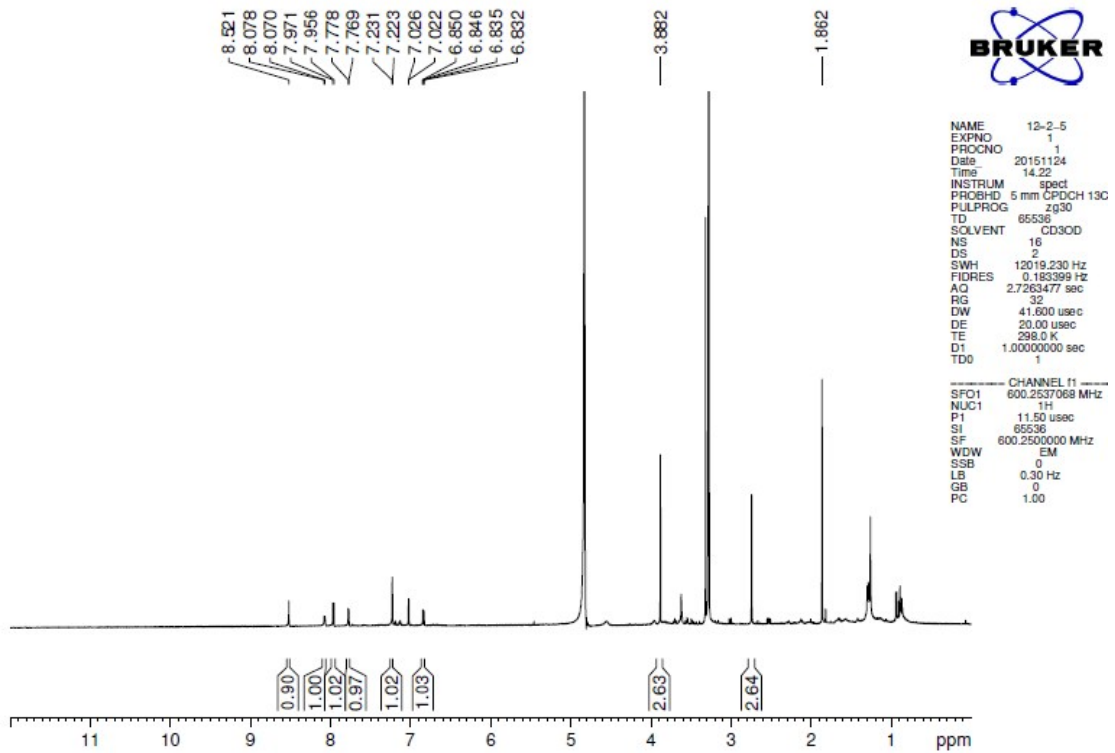

<sup>1</sup>H-NMR spectrum of compound 12

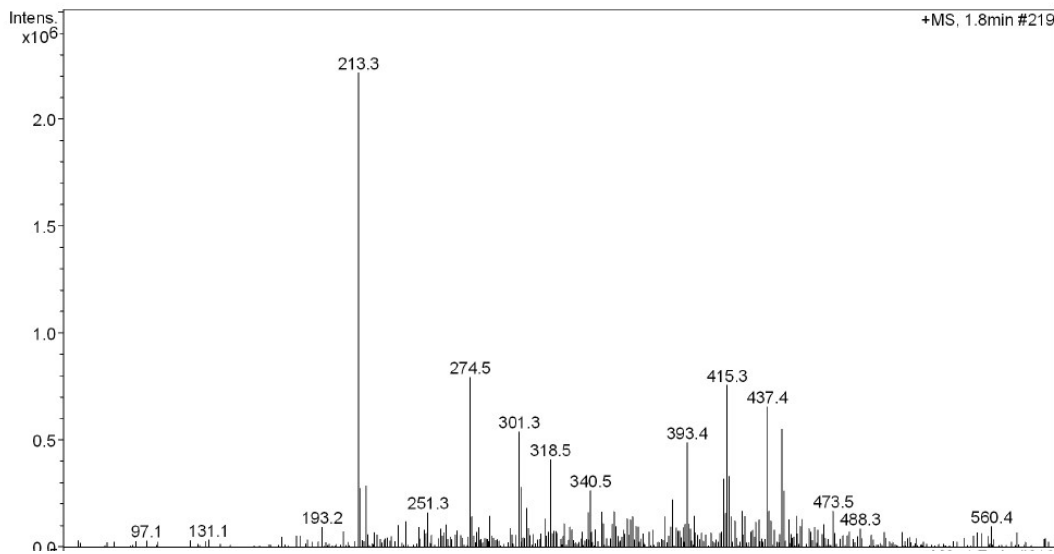

MS spectrum of compound 12

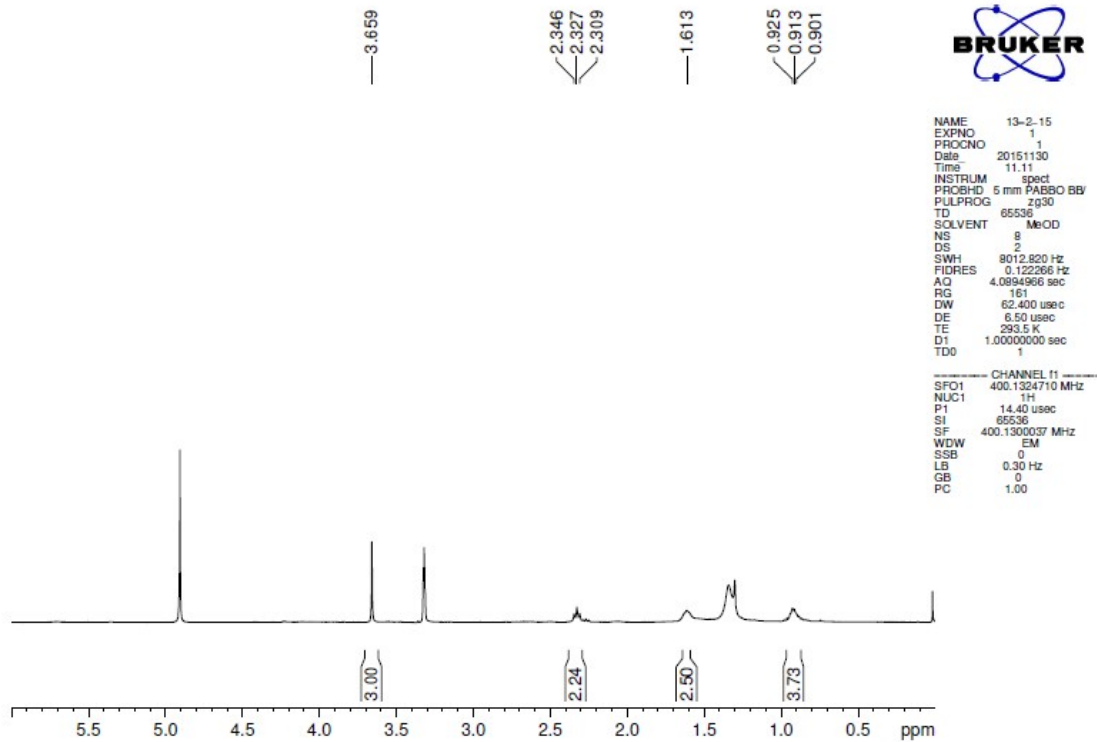

<sup>1</sup>H-NMR spectrum of compound 13

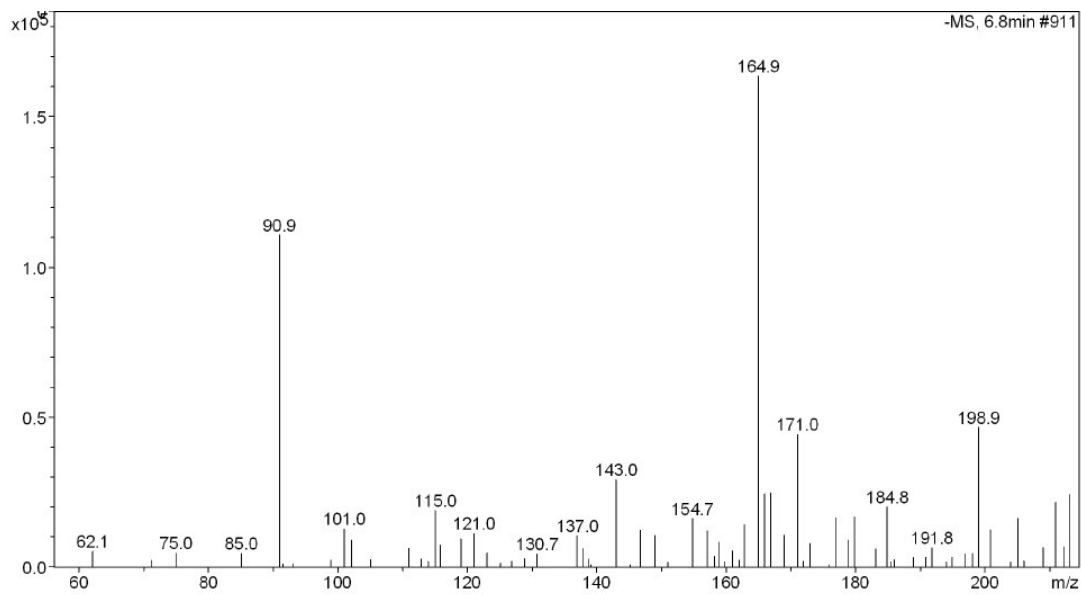

MS spectrum of compound 13

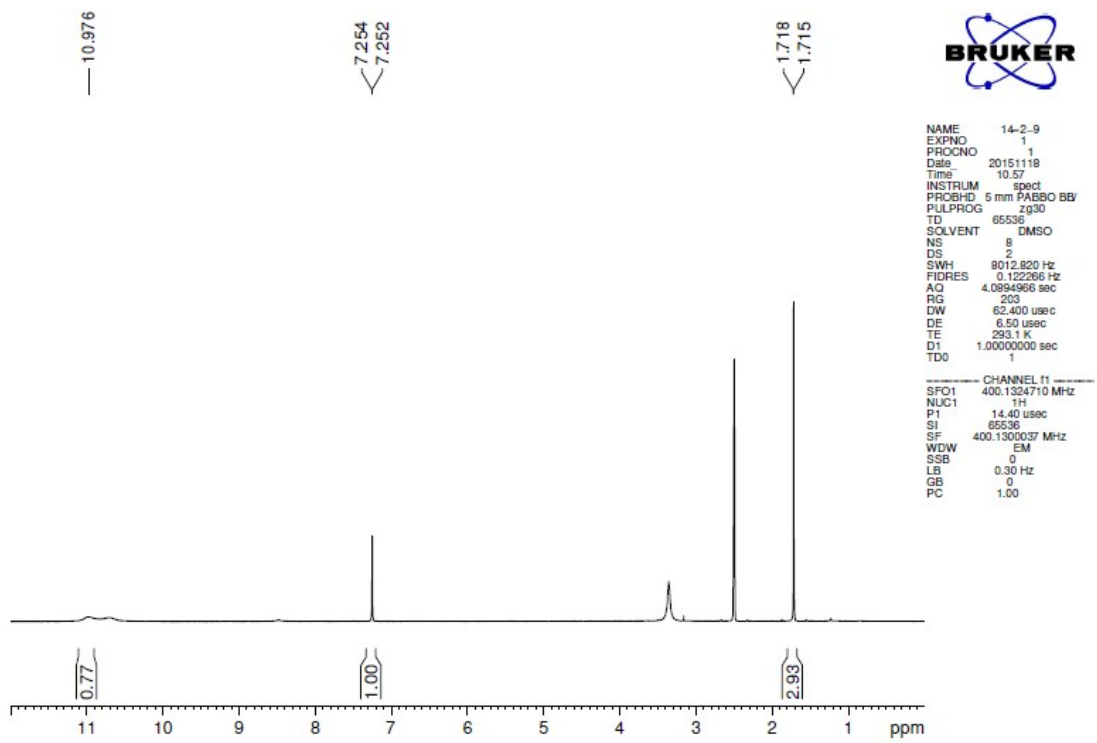

<sup>1</sup>H-NMR spectrum of compound 14

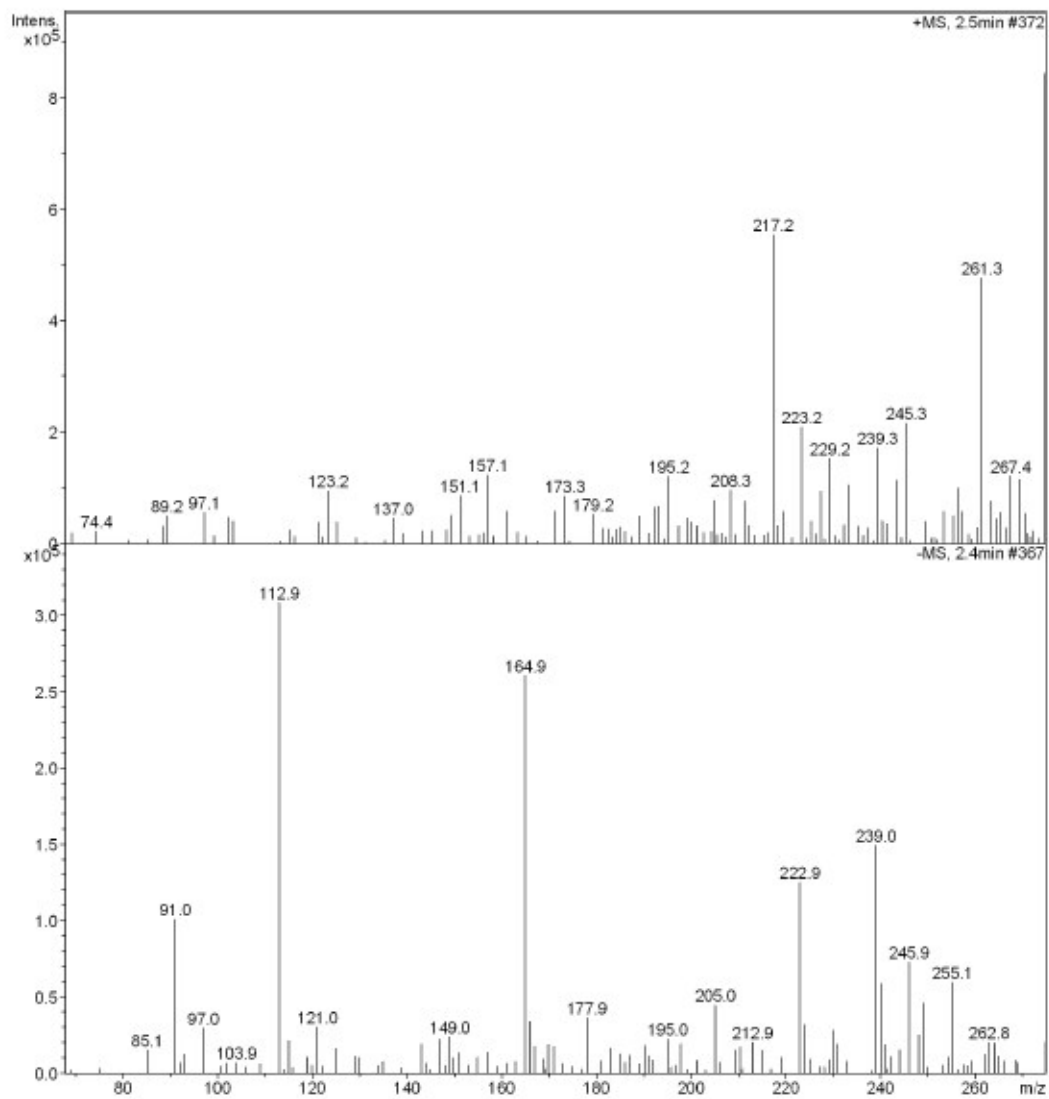

MS spectrum of compound 14

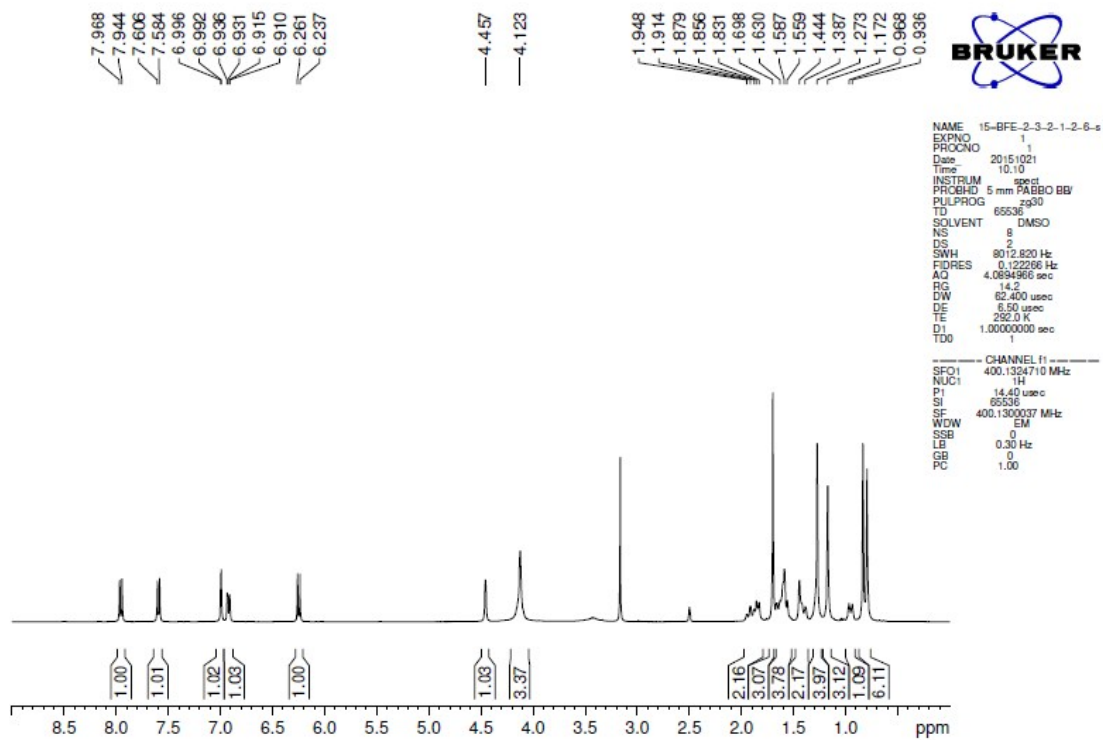

<sup>1</sup>H-NMR spectrum of substrate

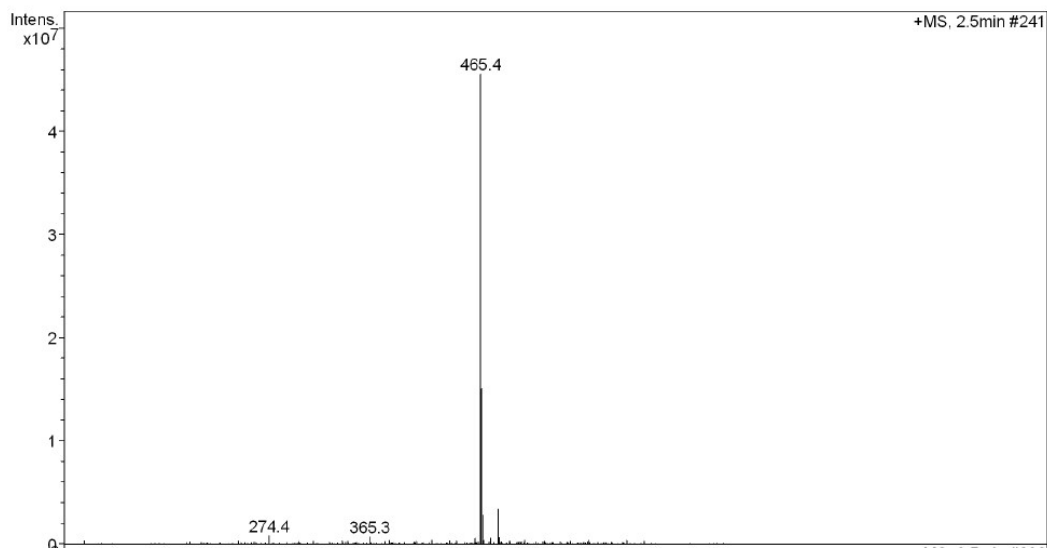

MS spectrum of substrate
